# Supplementary material
Source: Springer Nature journal article supplement (https://www.springerprofessional.de/resource/supplementary/13638_2011_347_MOESM9_ESM.pdf/11897654)
Supplement: MOESM9 [file 11897654]

### Revenue of Bandwidth Broker

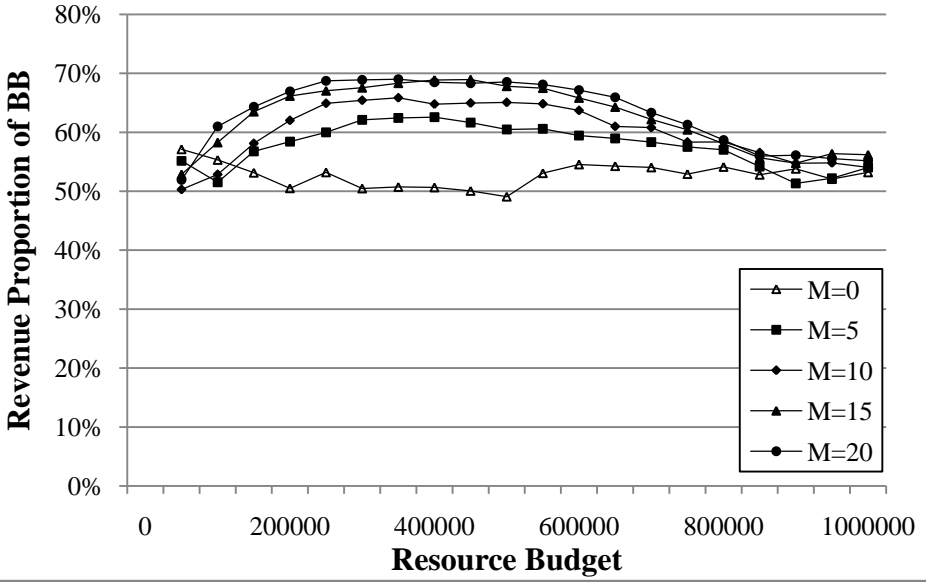

(a) The proportion of the revenue derived by the BB

### Average Revenue of Senders

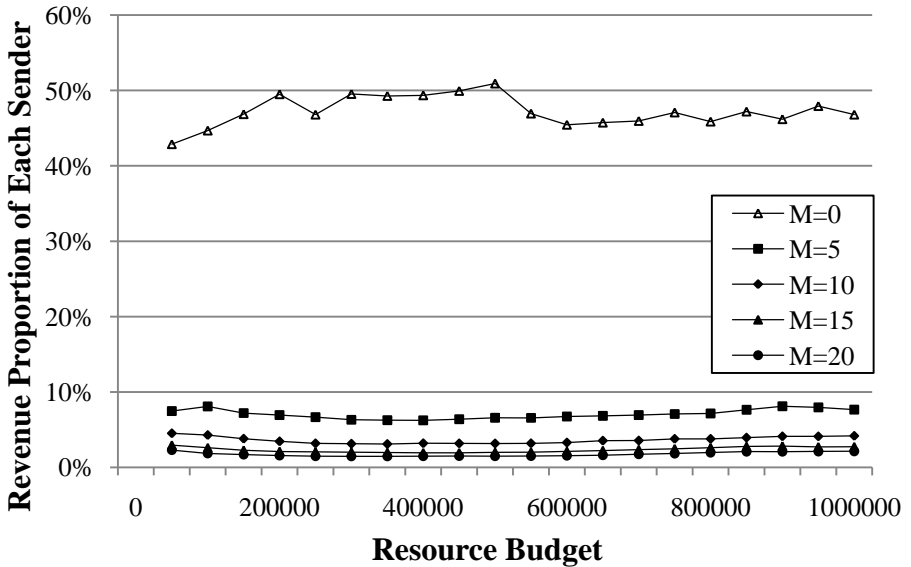

(b) The average proportion of the revenue derived by senders
